# Supplementary material for: Genome-Wide Expression of MicroRNAs Is Regulated by DNA Methylation in Hepatocarcinogenesis
Source: Hindawi journal article supplement (doi:10.1155/2015/230642), 2015-01-01
Supplement: f1 [file 230642.f1.pdf]

# **Genome-Wide Expression of MicroRNAs is Regulated by DNA Methylation in Hepatocarcinogenesis**

Jing Shen,<sup>1,2\*</sup> Shuang Wang,<sup>3</sup> Abby B. Siegel,<sup>4</sup> Helen Remotti,<sup>5</sup> Qiao Wang,<sup>1</sup> Iryna Sirosh,<sup>1</sup> and Regina M. Santella<sup>1,2</sup>

<sup>1</sup> *Department of Environmental Health Sciences, Mailman School of Public Health, Columbia University Medical Center, New York, NY 10032, USA;*

<sup>2</sup> *Herbert Irving Comprehensive Cancer Center, Columbia University Medical Center, New York, NY 10032, USA;*

<sup>3</sup> *Department of Biostatistics, Mailman School of Public Health, Columbia University Medical Center, New York, NY 10032, USA;*

<sup>4</sup> *Department of Medicine, Columbia University College of Physicians and Surgeons, New York, NY 10032, USA;*

<sup>5</sup> *Department of Pathology and Cell Biology, College of Physicians and Surgeons, Columbia University, New York, NY 10032, USA*

## Supplementary Materials

### Supplementary Figure Legend

#### **Supplementary FIGURE S1: Comparisons of up- or under-expressed miRNAs between tumor and non-tumor tissues in the discovery set (10 pairs)**

MiR-196b, miR-183, miR-10b<sup>#</sup> and miR-182 were significantly up-regulated, while miR-511, miR-144<sup>#</sup>, miR-486, miR-378, miR-139-5p, and miR-199a-3p were significantly down-regulated in HCC tumor tissues.

#### **Supplementary FIGURE S2: Hierarchical cluster analysis of the top 28 significantly differentially methylated CpG sites between 10 pairs of HCC tumor and adjacent non-tumor tissues**

Blue represents tumor tissue and red adjacent non-tumor tissue. The top 28 significant CpG sites can clearly distinguish HCC tumor from adjacent tissues without misclassification.

#### **Supplementary FIGURE S3: Genome-wide associations between DNA methylation and miRNA expression covered by TLDA and 450K arrays**

A Venn diagram describes the number of miRNAs covered by each assay (TLDA and 450K array), as well as detectable in over 80% samples. There are 628 miRNAs covered by both TLDA and 450K arrays, but only 222 were detectable in over 80% of samples. We focused our analyses on these 222 miRNAs. A total of 1,014 CpG sites were hypomethylated covering 206 miRNAs, and 501 CpG sites were hypermethylated covering 115 miRNAs.

#### **Supplementary FIGURE S4: Comparison of mir-199a-1's host gene (*DNM2*) mRNA expression in HCC tumor, precursor and normal liver tissues**

Significant under-expression of *DNM2* mRNA was observed in HCC tumor compared with precursor and normal liver tissues, which is consistent with the expression pattern of miR-199a in HCC tumor tissue.

#### **Supplementary FIGURE S5: Comparisons of mRNAs in HCC tumor, precursor and normal liver tissues**

A representative target gene for miR-125b (*LIN28B*) is displayed in Figure S5A. *LIN28B* was significantly over-expressed in HCC tumor compared with precursor and normal liver tissues ( $p < 0.001$ ). Figure S5B displays a representative target gene for miR-199a (*mTOR*) that was significantly over-expressed in HCC tumor compared with precursor and normal liver tissues ( $p < 0.001$ ).

**Supplementary TABLE S1:** Comparison of clinical and pathological characteristics for HCC subjects in the discovery (10 patients) and validation sets (56 patients)

**Supplementary TABLE S2:** Significantly aberrant DNA methylation of CpG sites associated with miRNAs in comparison of 10 pairs of HCC tumor and adjacent non-tumor tissues (adjusted  $p < 0.05$ )

**Supplementary TABLE S3:** Validation of the 28 significant CpG sites in additional 56 pairs of HCC tumor and adjacent non-tumor tissues (adjusted  $p < 0.05$ )

**Supplementary TABLE S4:** Validation of the inverse correlations between DNA methylation differences and miRNAs fold changes (N=56 pairs)

Supplementary FIGURE S1

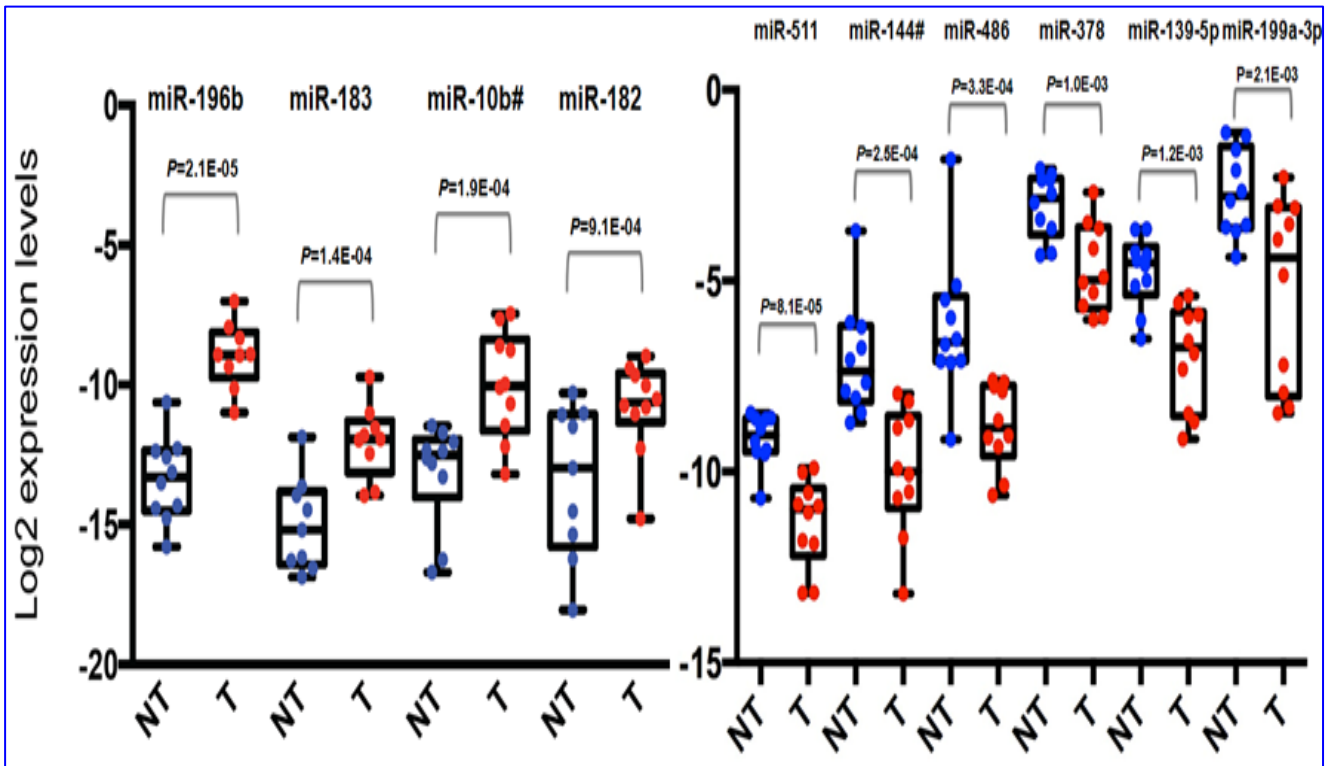

# Supplementary FIGURE S2

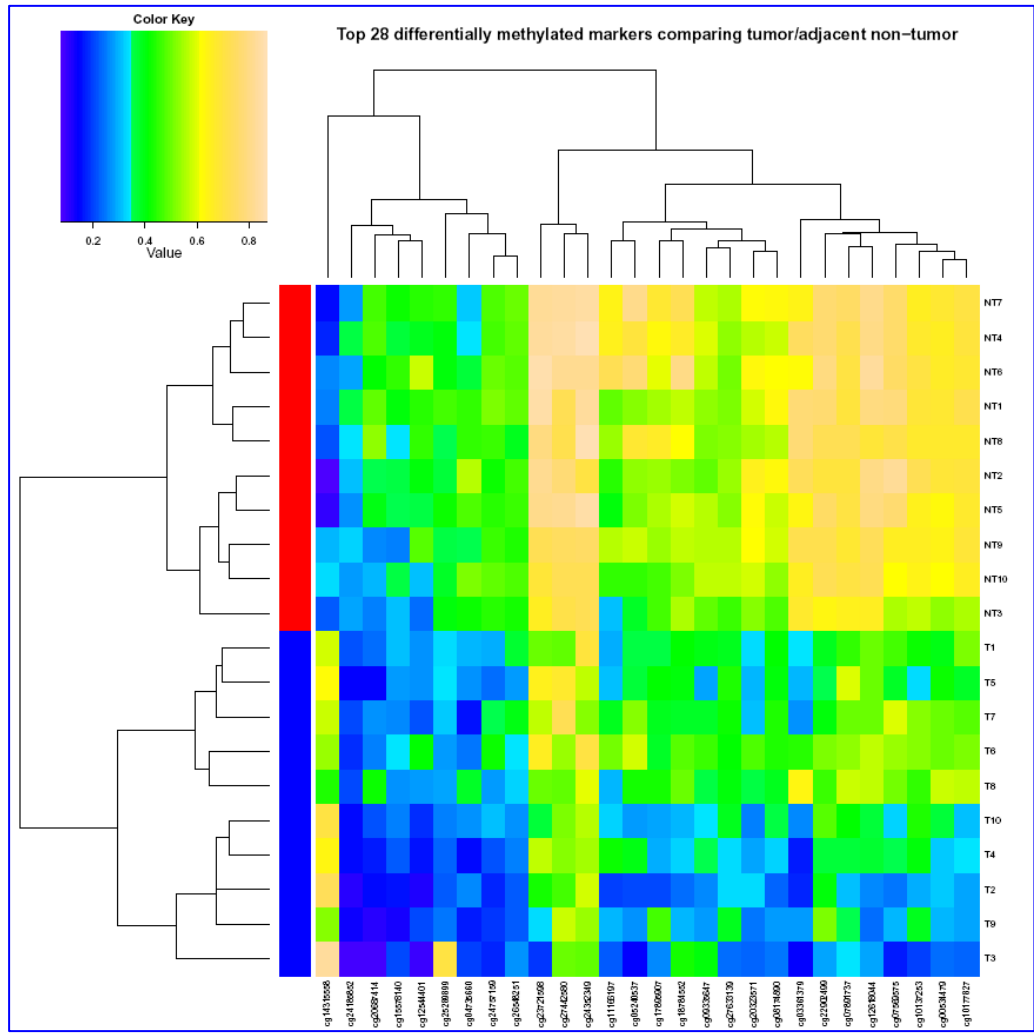

Supplementary FIGURE S3

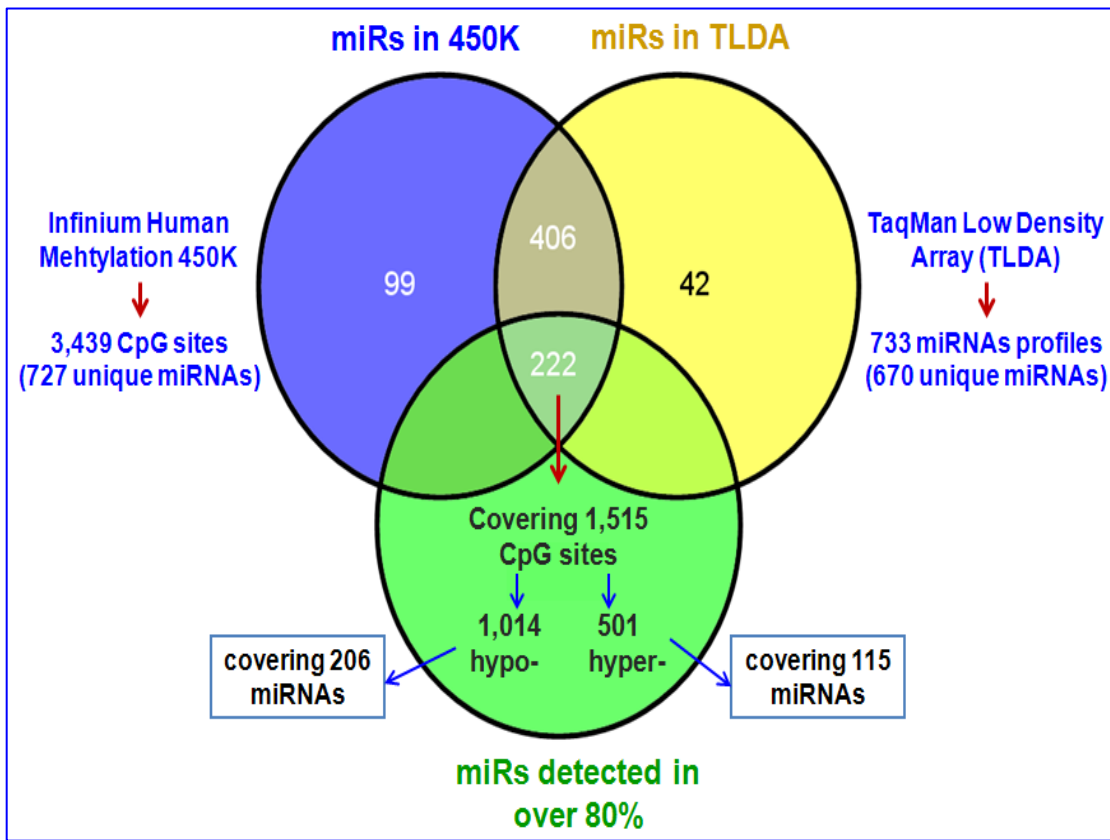

Supplementary FIGURE S4

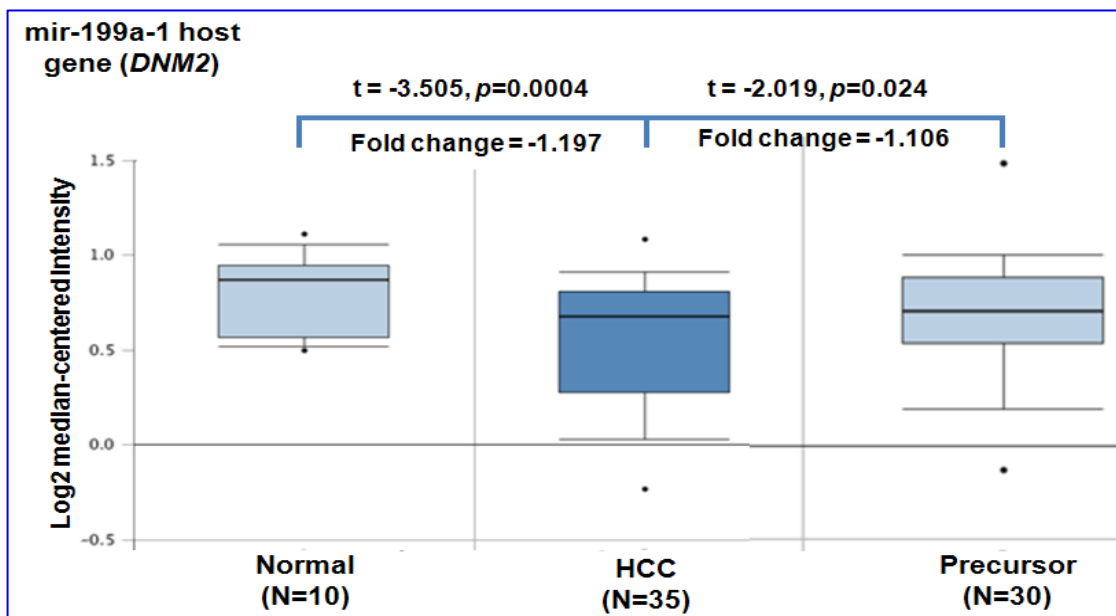

Supplementary FIGURE S5

Supplementary FIGURE S5A

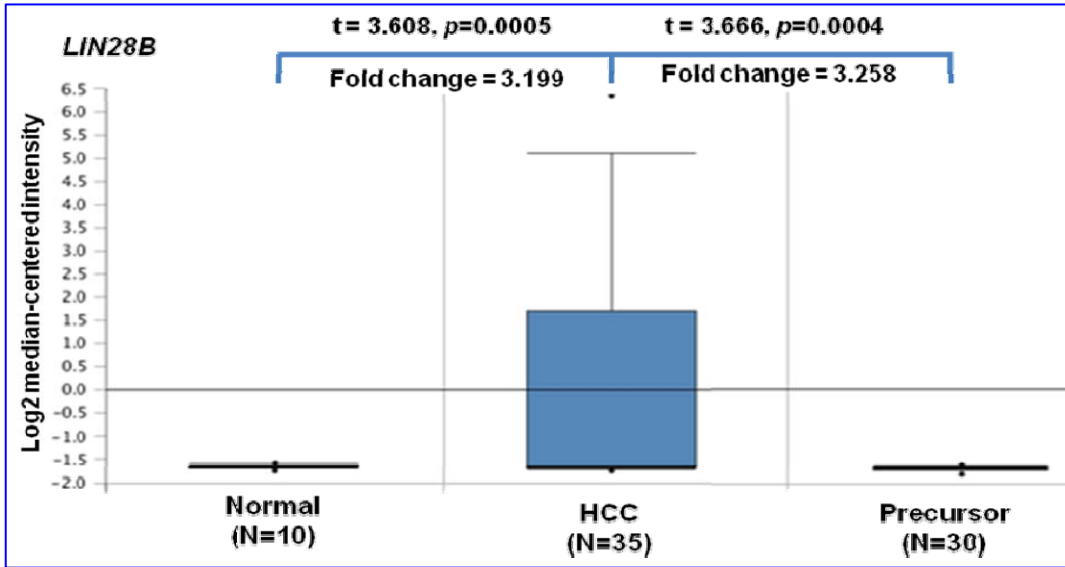

Supplementary FIGURE S5B

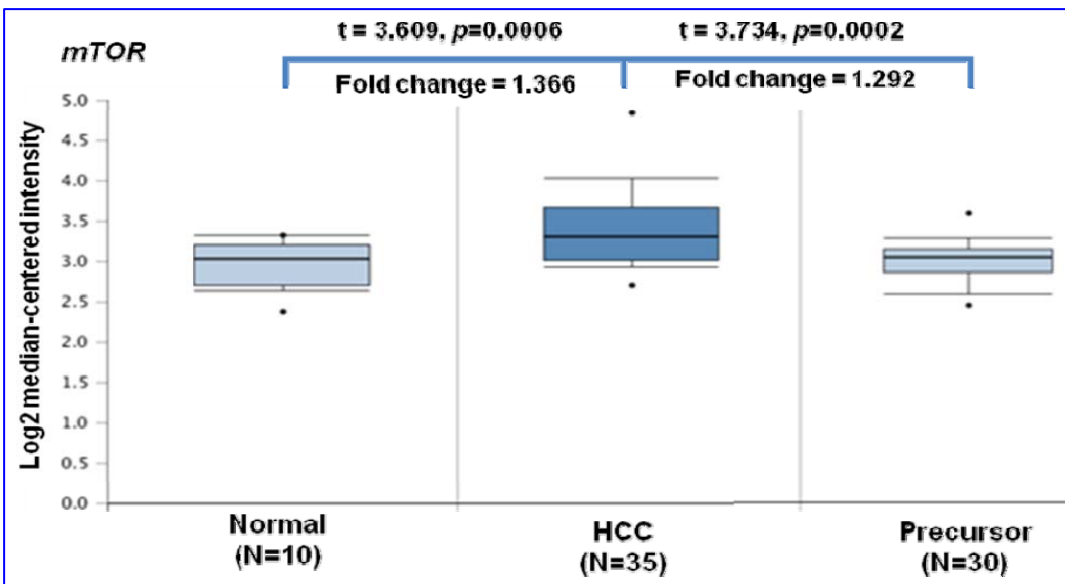



**Supplementary TABLE S1:** Comparison of clinical and pathological characteristics for HCC subjects in discovery set (10 patients) and validation set (56 patients)

| Variables                             | Discovery set  | Validation set | <i>p</i> values  |
|---------------------------------------|----------------|----------------|------------------|
| Age at diagnosis, Mean ± SD           | 62.7 ± 13.1    | 58.9 ± 14.9    | 4.53.E-01        |
| Age at diagnosis, No (%)              |                |                |                  |
| < 60 yrs                              | 3 (30.0)       | 26 (46.4)      |                  |
| ≥ 60 yrs                              | 7 (70.0)       | 30 (53.6)      | 3.35.E-01        |
| Gender, No (%)                        |                |                |                  |
| Male                                  | 5 (50.0)       | 45 (80.4)      |                  |
| Female                                | 5 (50.0)       | 11 (19.6)      | <b>3.91.E-02</b> |
| Ethnicity, No (%)                     |                |                |                  |
| Caucasian                             | 3 (30.0)       | 31 (55.5)      |                  |
| African-American                      | 2 (20.0)       | 4 (7.1)        |                  |
| Hispanic                              | 2 (20.0)       | 4 (7.1)        |                  |
| Asian                                 | 3 (30.0)       | 11 (19.6)      |                  |
| Unknown/Other                         | 0 (0.0)        | 6 (10.7)       | 3.98.E-01        |
| Viral infection, No (%)               |                |                |                  |
| HBV (-), HCV (-)                      | 1 (10.0)       | 18 (32.2)      |                  |
| HBV (-), HCV (+)                      | 5 (50.0)       | 14 (25.0)      |                  |
| HBV (+), HCV (-)                      | 4 (40.0)       | 9 (16.1)       |                  |
| HBV (+), HCV (+)                      | 0 (0.0)        | 4 (7.1)        |                  |
| Missing                               | 0 (0.0)        | 11 (19.6)      | 7.70.E-02        |
| Cigarette smoking, No (%)             |                |                |                  |
| No                                    | 6 (60.0)       | 21 (37.5)      |                  |
| Yes                                   | 4 (40.0)       | 32 (57.1)      |                  |
| Missing                               | 0 (0.0)        | 3 (5.4)        | 3.60.E-01        |
| Alcohol drinking, No (%)              |                |                |                  |
| No                                    | 5 (50.0)       | 22 (39.3)      |                  |
| Yes                                   | 5 (50.0)       | 31 (55.4)      |                  |
| Missing                               | 0 (0.0)        | 3 (5.4)        | 6.64.E-01        |
| AFP (ng/mL), Mean ± SD                | 6086.8 ± 17237 | 10275 ± 52910  | 6.68.E-01        |
| Tumor size (cm), Mean ± SD            | 7.8 ± 3.9      | 5.8 ± 4.8      | 2.12.E-01        |
| Cirrhosis, No (%)                     |                |                |                  |
| No                                    | 2 (20.0)       | 15 (26.8)      |                  |
| Yes                                   | 7 (70.0)       | 41 (73.2)      |                  |
| Missing                               | 1 (10.0)       | 0 (0.0)        | 5.60.E-02        |
| Tumor grade*, No (%)                  |                |                |                  |
| I-II                                  | 3 (30.0)       | 20 (35.7)      |                  |
| III                                   | 4 (40.0)       | 18 (32.1)      |                  |
| IV                                    | 3 (30.0)       | 15 (26.8)      |                  |
| Missing                               | 0 (0.0)        | 3 (5.4)        | 8.48.E-01        |
| Surgery, No (%)                       |                |                |                  |
| Hepatic resection alone               | 8 (80.0)       | 20 (35.7)      |                  |
| Transplant alone                      | 0 (0.0)        | 32 (57.1)      |                  |
| Both hepatic resection and transplant | 2 (20.0)       | 4 (7.2)        | 8.41.E-04        |
| Survival, No (%)                      |                |                |                  |

|     |          |           |           |
|-----|----------|-----------|-----------|
| Yes | 5 (50.0) | 33 (58.9) |           |
| No  | 5 (50.0) | 23 (41.1) | 5.99.E-01 |

---

\* Edmondson and Steiner grade

**Supplementary TABLE S2:** Significantly aberrant DNA methylation of CpG sites associated with miRNAs in comparison of 10 pairs of HCC tumor and adjacent non-tumor tissues (adjusted  $p < 0.05$ )

| TargetID   | Mean in HCC tumor tissue | Mean in HCC non-tumor tissue | Mean difference (tumor vs. non-tumor) | Adjusted P value | CHR | MAPINFO   | Name of miRNAs    | Host genes              |
|------------|--------------------------|------------------------------|---------------------------------------|------------------|-----|-----------|-------------------|-------------------------|
| cg22902499 | 0.4172                   | 0.7379                       | -0.3207                               | 5.44E-04         | 6   | 97754012  | miR-548H3         | MIR548H3                |
| cg20323571 | 0.3141                   | 0.5941                       | -0.2800                               | 1.08E-03         | 1   | 176999034 | miR-488           | MIR488;ASTN1;ASTN1      |
| cg05240537 | 0.3564                   | 0.5961                       | -0.2397                               | 2.66E-03         | X   | 103346747 | miR-1256          | MIR1256;MCART6          |
| cg24757159 | 0.2661                   | 0.4685                       | -0.2024                               | 8.94E-03         | 3   | 99345675  | miR-548G          | MIR548G                 |
| cg27633139 | 0.3750                   | 0.5307                       | -0.1556                               | 9.47E-03         | 4   | 9558893   | miR-548i2         | MIR548i2                |
| cg25289899 | 0.3222                   | 0.4020                       | -0.0798                               | 9.49E-03         | 11  | 2019167   | miR-675           | H19;MIR675              |
| cg24185852 | 0.1610                   | 0.3099                       | -0.1489                               | 9.61E-03         | 5   | 168690818 | miR-585           | MIR585;SLIT3            |
| cg23721598 | 0.4791                   | 0.7869                       | -0.3078                               | 1.00E-02         | 15  | 79501052  | miR-184           | MIR184                  |
| cg27442580 | 0.5532                   | 0.7720                       | -0.2189                               | 1.17E-02         | 6   | 97797349  | miR-548H3         | MIR548H3                |
| cg08174890 | 0.3533                   | 0.5829                       | -0.2296                               | 1.26E-02         | 4   | 9558077   | miR-548i2         | MIR548i2                |
| cg10137253 | 0.3971                   | 0.6663                       | -0.2692                               | 1.82E-02         | 14  | 101507590 | miR-300           | MIR300                  |
| cg15578140 | 0.2442                   | 0.3627                       | -0.1185                               | 1.91E-02         | 7   | 147718109 | miR-548F3         | MIR548F3;CNTNAP2        |
| cg11166197 | 0.3269                   | 0.5248                       | -0.1979                               | 1.96E-02         | X   | 151561584 | miR-105-1         | GABRA3;MIR105-1         |
| cg12618044 | 0.4175                   | 0.7645                       | -0.3470                               | 2.62E-02         | X   | 103296301 | miR-1256          | H2BFM;MIR1256           |
| cg04735660 | 0.2420                   | 0.4271                       | -0.1851                               | 2.72E-02         | 1   | 176999916 | miR-488           | MIR488;ASTN1;ASTN1      |
| cg00534479 | 0.3945                   | 0.6490                       | -0.2545                               | 2.76E-02         | 5   | 168196464 | miR-218-2         | SLIT3;MIR218-2          |
| cg12544401 | 0.2224                   | 0.4123                       | -0.1899                               | 2.89E-02         | X   | 103291721 | miR-1256          | MIR1256                 |
| cg07891737 | 0.4451                   | 0.7052                       | -0.2601                               | 2.96E-02         | 19  | 54215577  | miR-519D/miR-517A | MIR519D;MIR517A         |
| cg26548251 | 0.2969                   | 0.4637                       | -0.1667                               | 3.36E-02         | 7   | 147591462 | miR-548F3         | MIR548F3;CNTNAP2        |
| cg20687414 | 0.2064                   | 0.3946                       | -0.1881                               | 3.73E-02         | 3   | 44155764  | miR-138-1         | MIR138-1                |
| cg09335647 | 0.3530                   | 0.5481                       | -0.1950                               | 3.76E-02         | 7   | 147097440 | miR-548i4         | MIR548i4;CNTNAP2        |
| cg24352349 | 0.5830                   | 0.7996                       | -0.2166                               | 3.96E-02         | 22  | 45597767  | miR-1249          | C22orf9;C22orf9;MIR1249 |

|            |        |        |         |          |    |           |                     |                               |
|------------|--------|--------|---------|----------|----|-----------|---------------------|-------------------------------|
| cg10177827 | 0.3933 | 0.6765 | -0.2833 | 3.96E-02 | 14 | 101511425 | miR-487B/miR-381    | MIR487B;MIR381                |
| cg18784552 | 0.3780 | 0.6123 | -0.2343 | 4.35E-02 | X  | 113885574 | miR-1912            | MIR1912;HTR2C                 |
| cg07569575 | 0.3885 | 0.7204 | -0.3319 | 4.44E-02 | 5  | 168691938 | miR-585             | SLIT3;MIR585                  |
| cg03361379 | 0.3041 | 0.6996 | -0.3954 | 4.68E-02 | 7  | 157367159 | miR-153-2           | PTPRN2;PTPRN2;MIR153-2;PTPRN2 |
| cg17895907 | 0.3512 | 0.5711 | -0.2199 | 4.78E-02 | X  | 146366330 | miR-514-3/miR-514-2 | MIR514-3;MIR514-2             |
| cg14315558 | 0.6215 | 0.2117 | 0.4098  | 4.99E-02 | 21 | 26934682  | miR-155HG           | MIR155HG                      |

**Supplementary TABLE S3:** Validation of the 28 significant CpG sites in additional 56 pairs of HCC tumor and adjacent non-tumor tissues (adjusted  $p < 0.05$ )

| TargetID   | Mean in HCC tumor tissue | Mean in HCC non-tumor tissue | Mean difference (tumor vs. non-tumor) | Adjusted P value | CHR | MAPINFO   | Name of miRNAs    | Host genes              |
|------------|--------------------------|------------------------------|---------------------------------------|------------------|-----|-----------|-------------------|-------------------------|
| cg22902499 | 0.4333                   | 0.7277                       | -0.2945                               | 9.71E-17         | 6   | 97754012  | miR-548H3         | MIR548H3                |
| cg20323571 | 0.2885                   | 0.5780                       | -0.2895                               | 9.27E-24         | 1   | 176999034 | miR-488           | MIR488;ASTN1;ASTN1      |
| cg05240537 | 0.3728                   | 0.6486                       | -0.2758                               | 7.31E-17         | X   | 103346747 | miR-1256          | MIR1256;MCART6          |
| cg24757159 | 0.2874                   | 0.4781                       | -0.1907                               | 1.36E-16         | 3   | 99345675  | miR-548G          | MIR548G                 |
| cg27633139 | 0.3648                   | 0.5513                       | -0.1865                               | 2.27E-17         | 4   | 9558893   | miR-548i2         | MIR548I2                |
| cg25289899 | 0.2865                   | 0.4153                       | -0.1288                               | 2.16E-10         | 11  | 2019167   | miR-675           | H19;MIR675              |
| cg24185852 | 0.1734                   | 0.3085                       | -0.1351                               | 3.46E-22         | 5   | 168690818 | miR-585           | MIR585;SLIT3            |
| cg23721598 | 0.4487                   | 0.7566                       | -0.3079                               | 1.04E-16         | 15  | 79501052  | miR-184           | MIR184                  |
| cg27442580 | 0.4493                   | 0.7353                       | -0.2860                               | 6.68E-15         | 6   | 97797349  | miR-548H3         | MIR548H3                |
| cg08174890 | 0.3638                   | 0.5888                       | -0.2250                               | 1.90E-18         | 4   | 9558077   | miR-548i2         | MIR548I2                |
| cg10137253 | 0.4059                   | 0.6654                       | -0.2595                               | 4.34E-19         | 14  | 101507590 | miR-300           | MIR300                  |
| cg15578140 | 0.2326                   | 0.3489                       | -0.1163                               | 2.53E-12         | 7   | 147718109 | miR-548F3         | MIR548F3;CNTNAP2        |
| cg11166197 | 0.3728                   | 0.5662                       | -0.1934                               | 4.82E-13         | X   | 151561584 | miR-105-1         | GABRA3;MIR105-1         |
| cg12618044 | 0.4226                   | 0.7702                       | -0.3476                               | 9.10E-19         | X   | 103296301 | miR-1256          | H2BFM;MIR1256           |
| cg04735660 | 0.2641                   | 0.4619                       | -0.1979                               | 5.55E-18         | 1   | 176999916 | miR-488           | MIR488;ASTN1;ASTN1      |
| cg00534479 | 0.3706                   | 0.6521                       | -0.2815                               | 1.10E-18         | 5   | 168196464 | miR-218-2         | SLIT3;MIR218-2          |
| cg12544401 | 0.2452                   | 0.4749                       | -0.2298                               | 4.49E-19         | X   | 103291721 | miR-1256          | MIR1256                 |
| cg07891737 | 0.4199                   | 0.6837                       | -0.2638                               | 1.47E-16         | 19  | 54215577  | miR-519D/miR-517A | MIR519D;MIR517A         |
| cg26548251 | 0.2865                   | 0.4431                       | -0.1566                               | 3.51E-11         | 7   | 147591462 | miR-548F3         | MIR548F3;CNTNAP2        |
| cg20687414 | 0.2009                   | 0.4088                       | -0.2079                               | 5.21E-17         | 3   | 44155764  | miR-138-1         | MIR138-1                |
| cg09335647 | 0.3079                   | 0.5441                       | -0.2362                               | 6.87E-20         | 7   | 147097440 | miR-548i4         | MIR548I4;CNTNAP2        |
| cg24352349 | 0.6480                   | 0.7787                       | -0.1307                               | 2.57E-10         | 22  | 45597767  | miR-1249          | C22orf9;C22orf9;MIR1249 |
| cg10177827 | 0.4204                   | 0.6903                       | -0.2699                               | 1.30E-19         | 14  | 101511425 | miR-487B/miR-381  | MIR487B;MIR381          |
| cg18784552 | 0.3516                   | 0.5914                       | -0.2398                               | 5.67E-16         | X   | 113885574 | miR-1912          | MIR1912;HTR2C           |

|            |        |        |         |          |    |           |                     |                               |
|------------|--------|--------|---------|----------|----|-----------|---------------------|-------------------------------|
| cg07569575 | 0.3930 | 0.7246 | -0.3317 | 2.48E-19 | 5  | 168691938 | miR-585             | SLIT3;MIR585                  |
| cg03361379 | 0.3158 | 0.6886 | -0.3729 | 1.61E-20 | 7  | 157367159 | miR-153-2           | PTPRN2;PTPRN2;MIR153-2;PTPRN2 |
| cg17895907 | 0.3012 | 0.5452 | -0.2440 | 1.63E-18 | X  | 146366330 | miR-514-3/miR-514-2 | MIR514-3;MIR514-2             |
| cg14315558 | 0.5998 | 0.2146 | 0.3852  | 3.11E-17 | 21 | 26934682  | miR-155HG           | MIR155HG                      |

**Supplementary TABLE S4:** Validation of the inverse correlations between DNA methylation differences and miRNAs fold changes (N=56 pairs)

| miRNAs<br>(chromosome location) | CpG sites  | Distance to<br>miRNA (bp) | Methylation<br>difference<br>(T vs. NT) | Fold change<br>(T vs. NT) | Spearman<br>Correlation<br>Coefficients | p values         |
|---------------------------------|------------|---------------------------|-----------------------------------------|---------------------------|-----------------------------------------|------------------|
| <b>mir-10a</b>                  | cg15649236 | 195                       | 0.1                                     | -1.45                     | 0.04                                    | 6.69.E-01        |
| 17q21.32                        | cg01572694 | 246                       | 0.03                                    | -1.45                     | -0.03                                   | 7.26.E-01        |
| 46,657,200-46,657,309           | cg14884929 | 347                       | -0.01                                   | -1.45                     | 0.28                                    | <b>3.20.E-03</b> |
| <b>mir-18a</b>                  | cg17799287 | 1241                      | -0.07                                   | 1.27                      | -0.04                                   | 7.09.E-01        |
| 13q31.3                         | cg07641807 | 1046                      | -0.09                                   | 1.27                      | -0.06                                   | 5.17.E-01        |
| (92,002,997-92,003,088)         | cg23665802 | 667                       | -0.09                                   | 1.27                      | -0.01                                   | 9.26.E-01        |
|                                 | cg02297838 | 551                       | -0.11                                   | 1.27                      | -0.08                                   | 4.01.E-01        |
| <b>mir-125b-1</b>               | cg02101355 | 142                       | 0.02                                    | -1.51                     | -0.23                                   | <b>1.35.E-02</b> |
| 11q24.1                         | cg03891346 | 173                       | 0.004                                   | -1.51                     | -0.27                                   | <b>3.90.E-03</b> |
| 121,970,465-121,970,552         | cg24150623 | 540                       | 0.11                                    | -1.51                     | -0.3                                    | <b>1.40.E-03</b> |
|                                 | cg06749053 | 667                       | 0.08                                    | -1.51                     | -0.29                                   | <b>1.60.E-03</b> |
|                                 | cg20475322 | 680                       | 0.17                                    | -1.51                     | -0.29                                   | <b>1.80.E-03</b> |
|                                 | cg24603444 | 782                       | 0.09                                    | -1.51                     | -0.27                                   | <b>3.90.E-03</b> |
|                                 | cg16865908 | 0                         | 0.04                                    | -1.51                     | -0.18                                   | 6.20.E-02        |
|                                 | cg26916936 | 61                        | 0.06                                    | -1.51                     | -0.1                                    | 3.04.E-01        |
|                                 | cg07685357 | 1402                      | 0.07                                    | -1.51                     | -0.29                                   | <b>2.10.E-03</b> |
| <b>mir-182</b>                  | cg16576544 | 0                         | -0.09                                   | 2.31                      | -0.18                                   | 5.39.E-02        |
| 7q32.2                          | cg24423782 | 85                        | -0.09                                   | 2.31                      | -0.15                                   | 1.19.E-01        |
| 129,410,223-129,410,332         | cg17677032 | 95                        | -0.04                                   | 2.31                      | -0.01                                   | 8.82.E-01        |
|                                 | cg04579608 | 103                       | -0.07                                   | 2.31                      | -0.11                                   | 2.66.E-01        |
|                                 | cg13713066 | 325                       | -0.08                                   | 2.31                      | -0.16                                   | 9.76.E-02        |
| <b>mir-199a-1</b>               | cg27648270 | 0                         | 0.07                                    | -2.58                     | -0.61                                   | <b>1.00.E-04</b> |

|                       |            |      |       |       |       |                  |
|-----------------------|------------|------|-------|-------|-------|------------------|
| 19p13.2               | cg18544365 | 6    | 0.06  | -2.58 | -0.61 | <b>1.00.E-04</b> |
| 10,928,102-10,928,172 | cg23047544 | 39   | 0.08  | -2.58 | -0.61 | <b>1.00.E-04</b> |
|                       | cg02660440 | 61   | 0.08  | -2.58 | -0.63 | <b>1.00.E-04</b> |
|                       | cg06754197 | 150  | 0.04  | -2.58 | -0.55 | <b>1.00.E-04</b> |
|                       | cg02907064 | 155  | 0.07  | -2.58 | -0.59 | <b>1.00.E-04</b> |
|                       | cg23068797 | 377  | 0.09  | -2.58 | -0.61 | <b>1.00.E-04</b> |
|                       | cg03216043 | 467  | 0.1   | -2.58 | -0.6  | <b>1.00.E-04</b> |
|                       | cg13965612 | 524  | 0.07  | -2.58 | -0.54 | <b>1.00.E-04</b> |
| <b>mir-1180</b>       | cg04864152 | 15   | -0.01 | 1.57  | -0.15 | 1.06.E-01        |
|                       | cg20272287 | 18   | -0.02 | 1.57  | -0.15 | 1.10.E-01        |
|                       | cg02796621 | 678  | -0.05 | 1.57  | 0.23  | <b>1.54.E-02</b> |
|                       | cg02206323 | 1181 | -0.05 | 1.57  | 0.23  | <b>1.64.E-02</b> |
|                       | cg26619894 | 1277 | -0.06 | 1.57  | 0.28  | <b>2.90.E-03</b> |
